# Supplementary material for: The relevance of nanoscale biological fragments for ice nucleation in clouds
Source: PubMed Central journal article supplement (PMC4308702; doi:10.1038/srep08082), 2015-01-28
Supplement: srep08082-s1.pdf [file srep08082-s1.pdf]

## Supplementary Information For:

### The relevance of nanoscale biological fragments for ice nucleation in clouds

D. O'Sullivan, B. J. Murray, J. F. Ross, T. F. Whale, H. C. Price, J. D. Atkinson, N.S. Umo & M.E. Webb

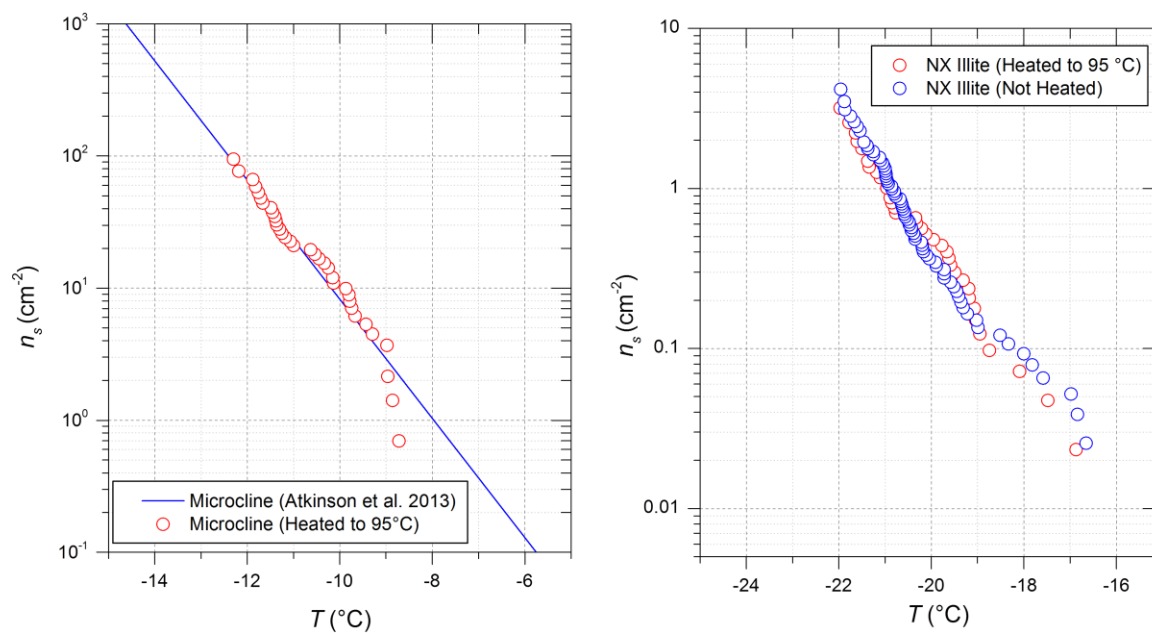

Figure S1: Ice active surface site densities for potassium feldspar (microcline) and NX illite before and after heating of the suspensions to  $95^{\circ}\text{C}$  for 45 minutes. The parameterization for unheated microcline is taken from Atkinson et al. <sup>1</sup>, where full details of the mineralogy for both samples used can be found.

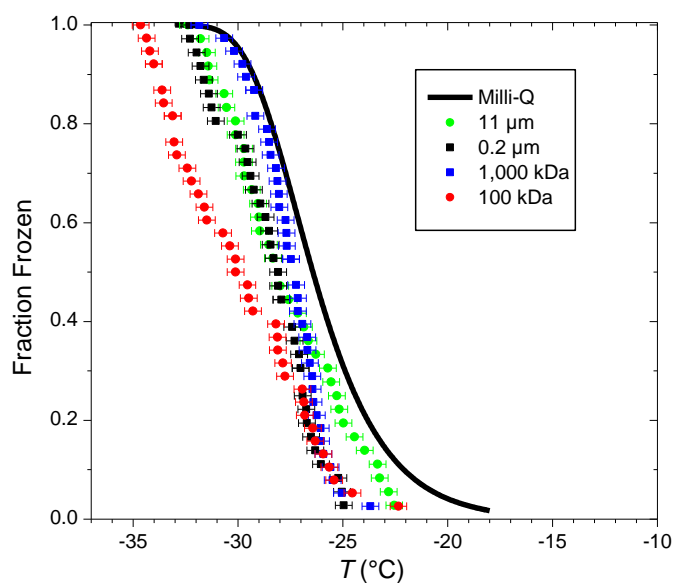

Figure S2: Fraction frozen data for Milli-Q water after it has been passed through the filters used in the following study. Illustrated are data for the 11  $\mu\text{m}$ , 0.2  $\mu\text{m}$  1000 kDa and 100 kDa filters employed. Also shown is the fraction frozen curve for Milli-Q water derived from the best fit line to the cumulative nucleus spectra of 23 separate experiments (737 drops in total).

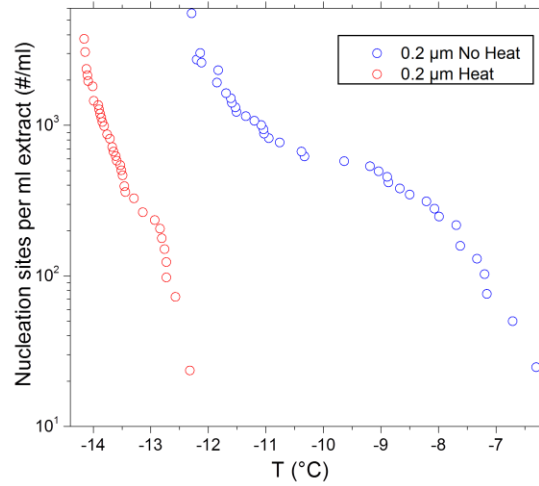

Figure S3: Cumulative nucleus spectra for the 0.2  $\mu\text{m}$  a filtrates of the soil suspension. Indicated are the samples prior to heating (blue circles) and after heating (red circles)

- 1 Atkinson, J. D. *et al.* The importance of feldspar for ice nucleation by mineral dust in mixed-phase clouds. *Nature* **498**, 355-358, (2013).
